# Supplementary material
Source: PubMed Central journal article supplement (PMC1994974)

A

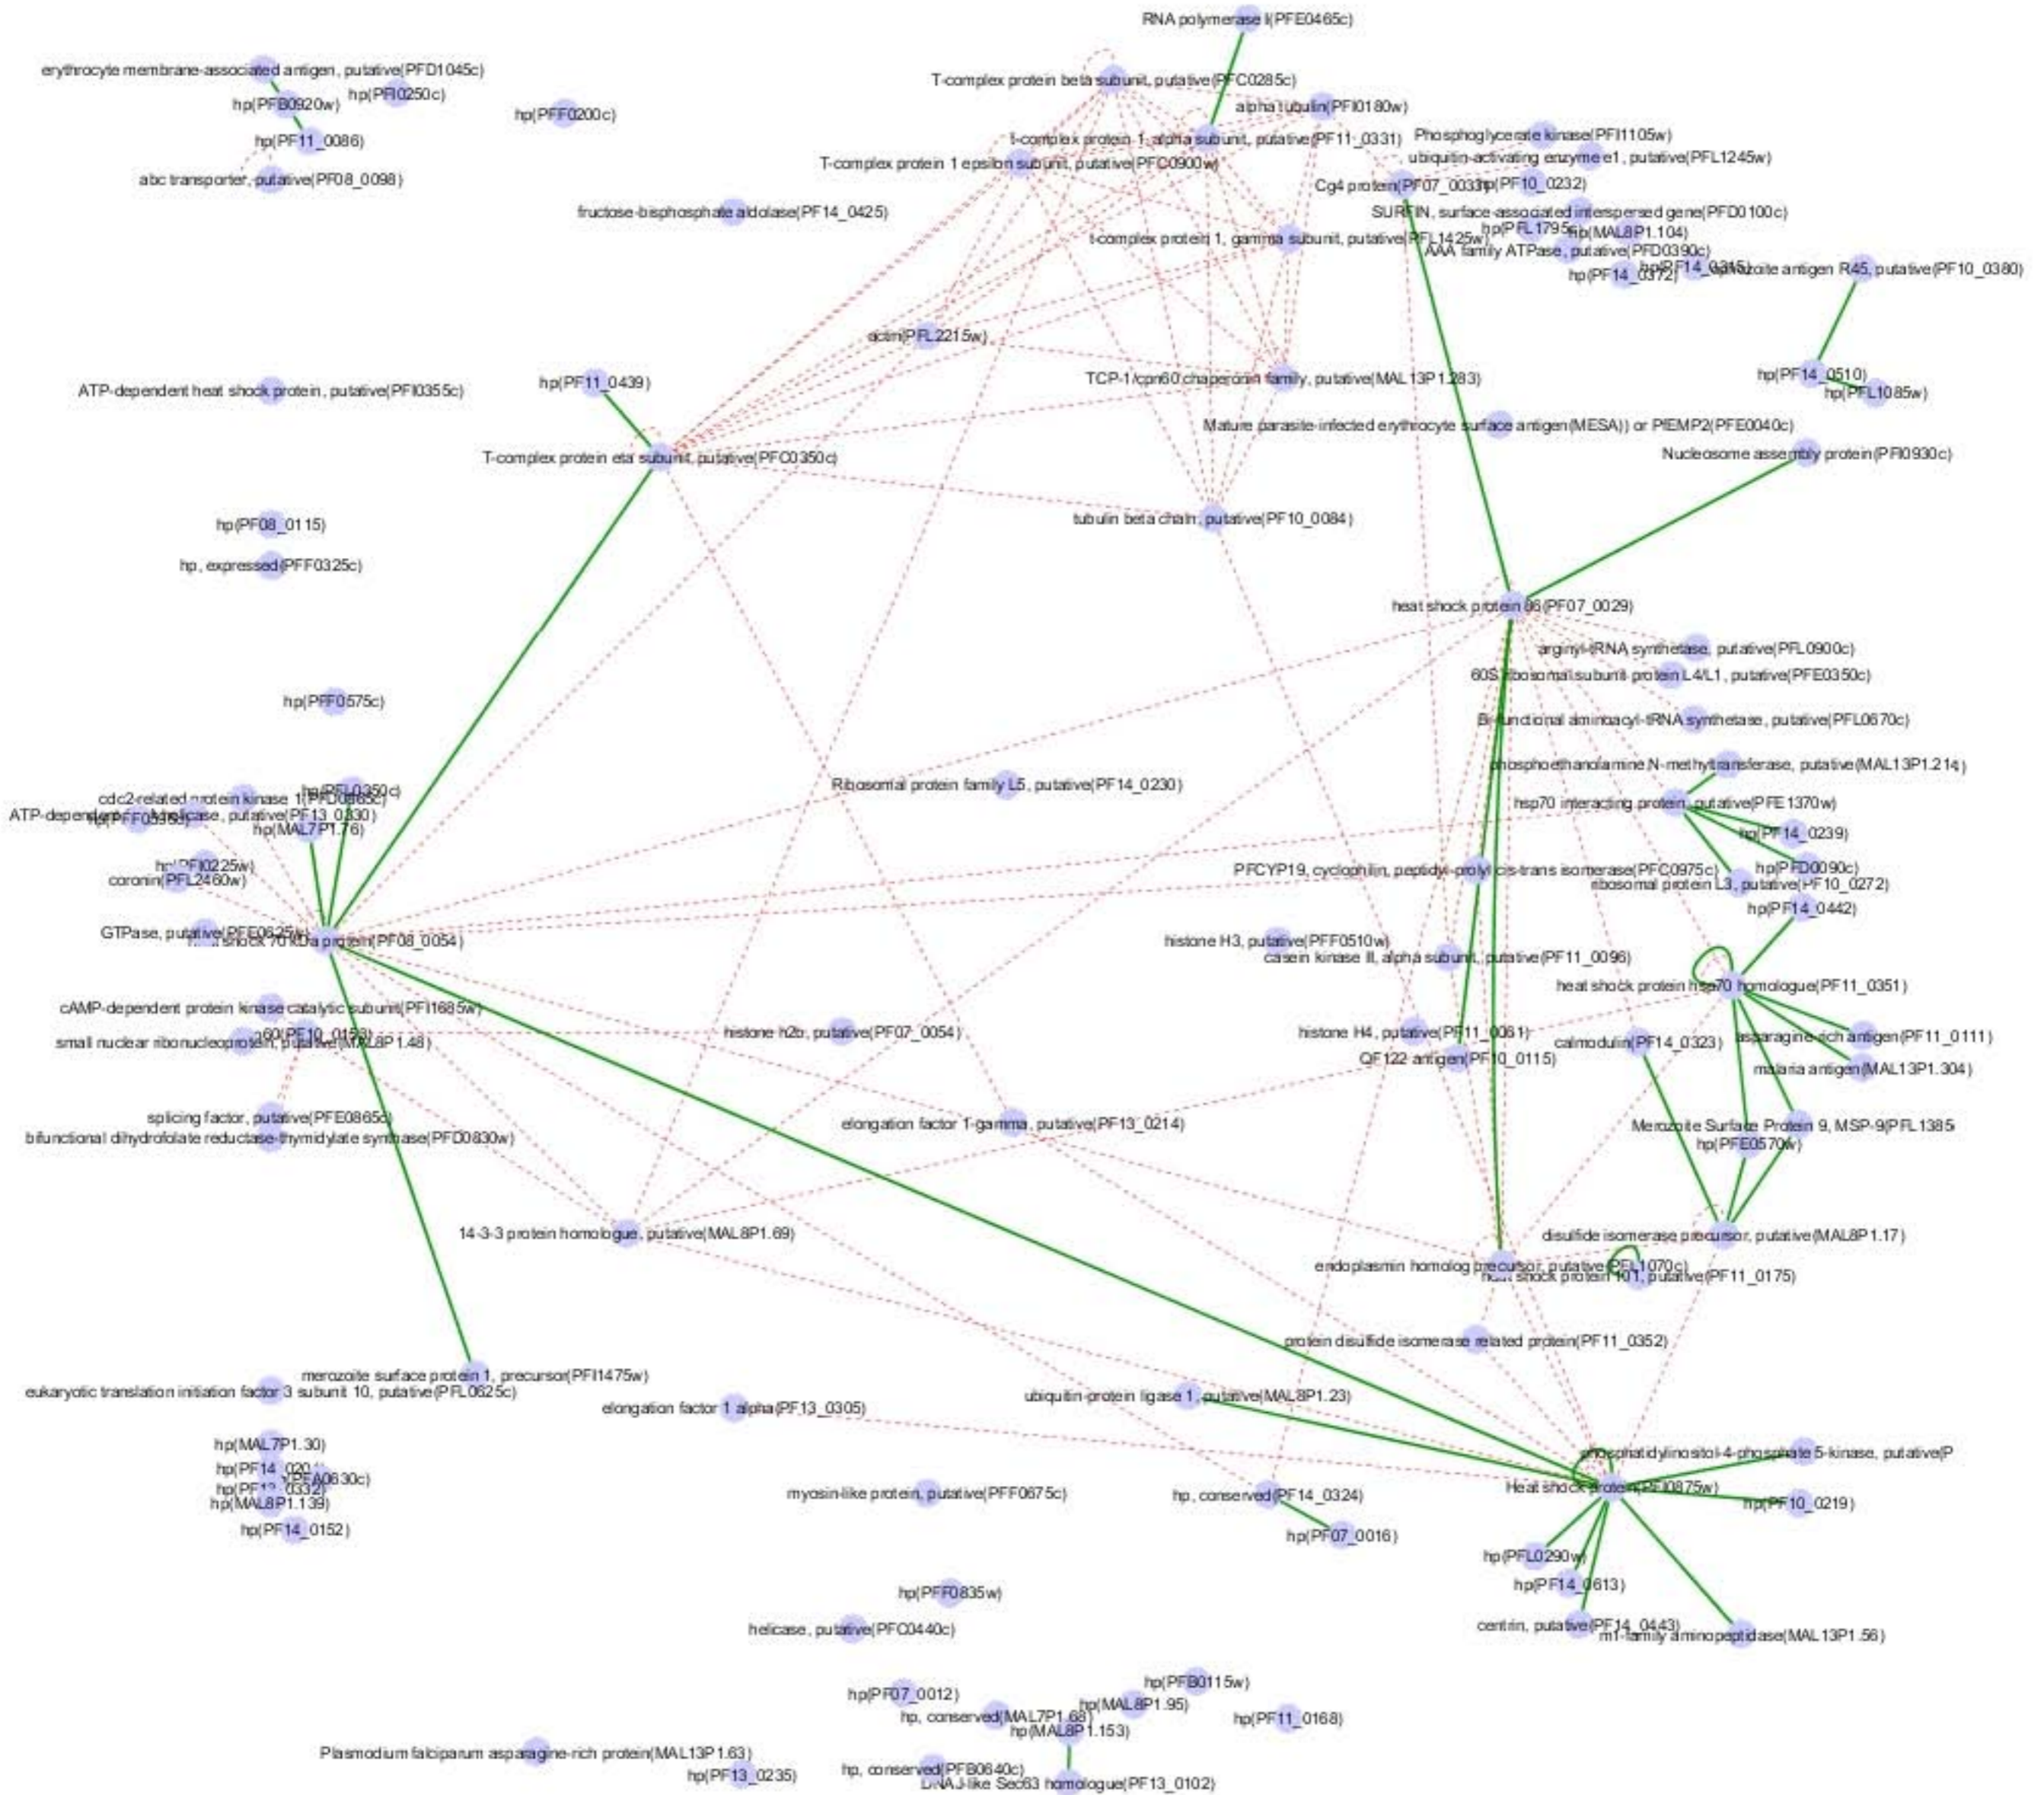

B

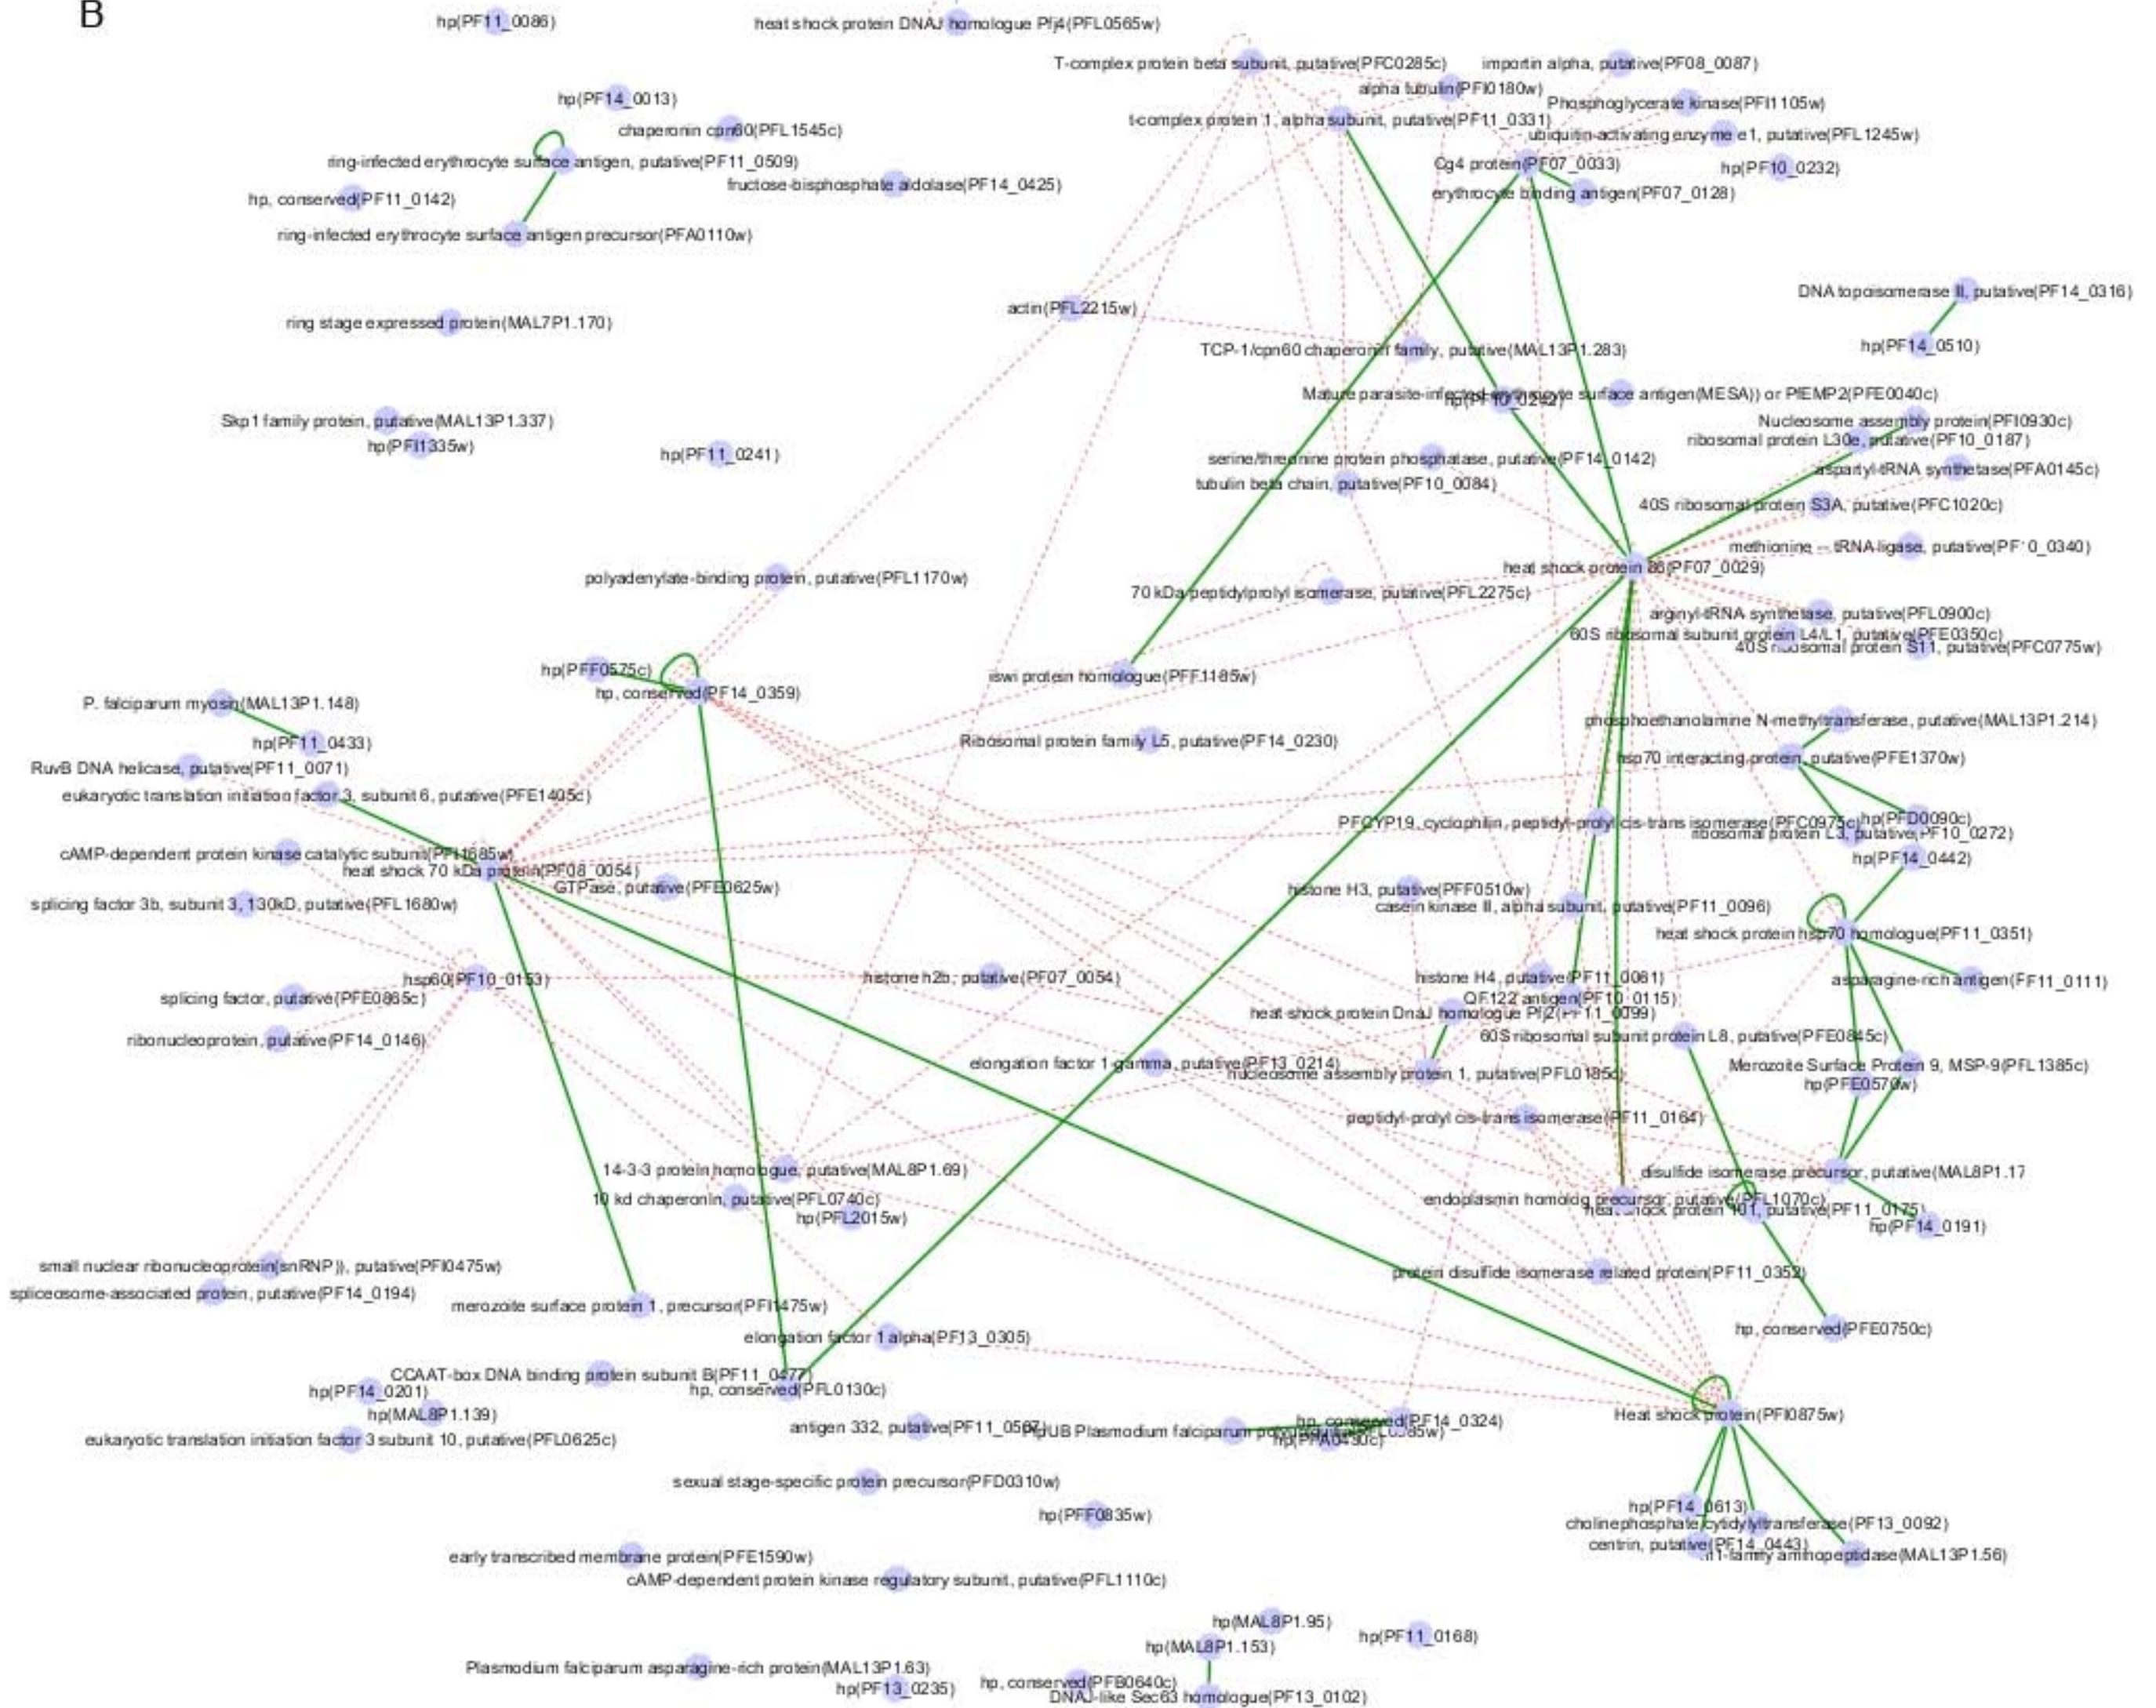



D

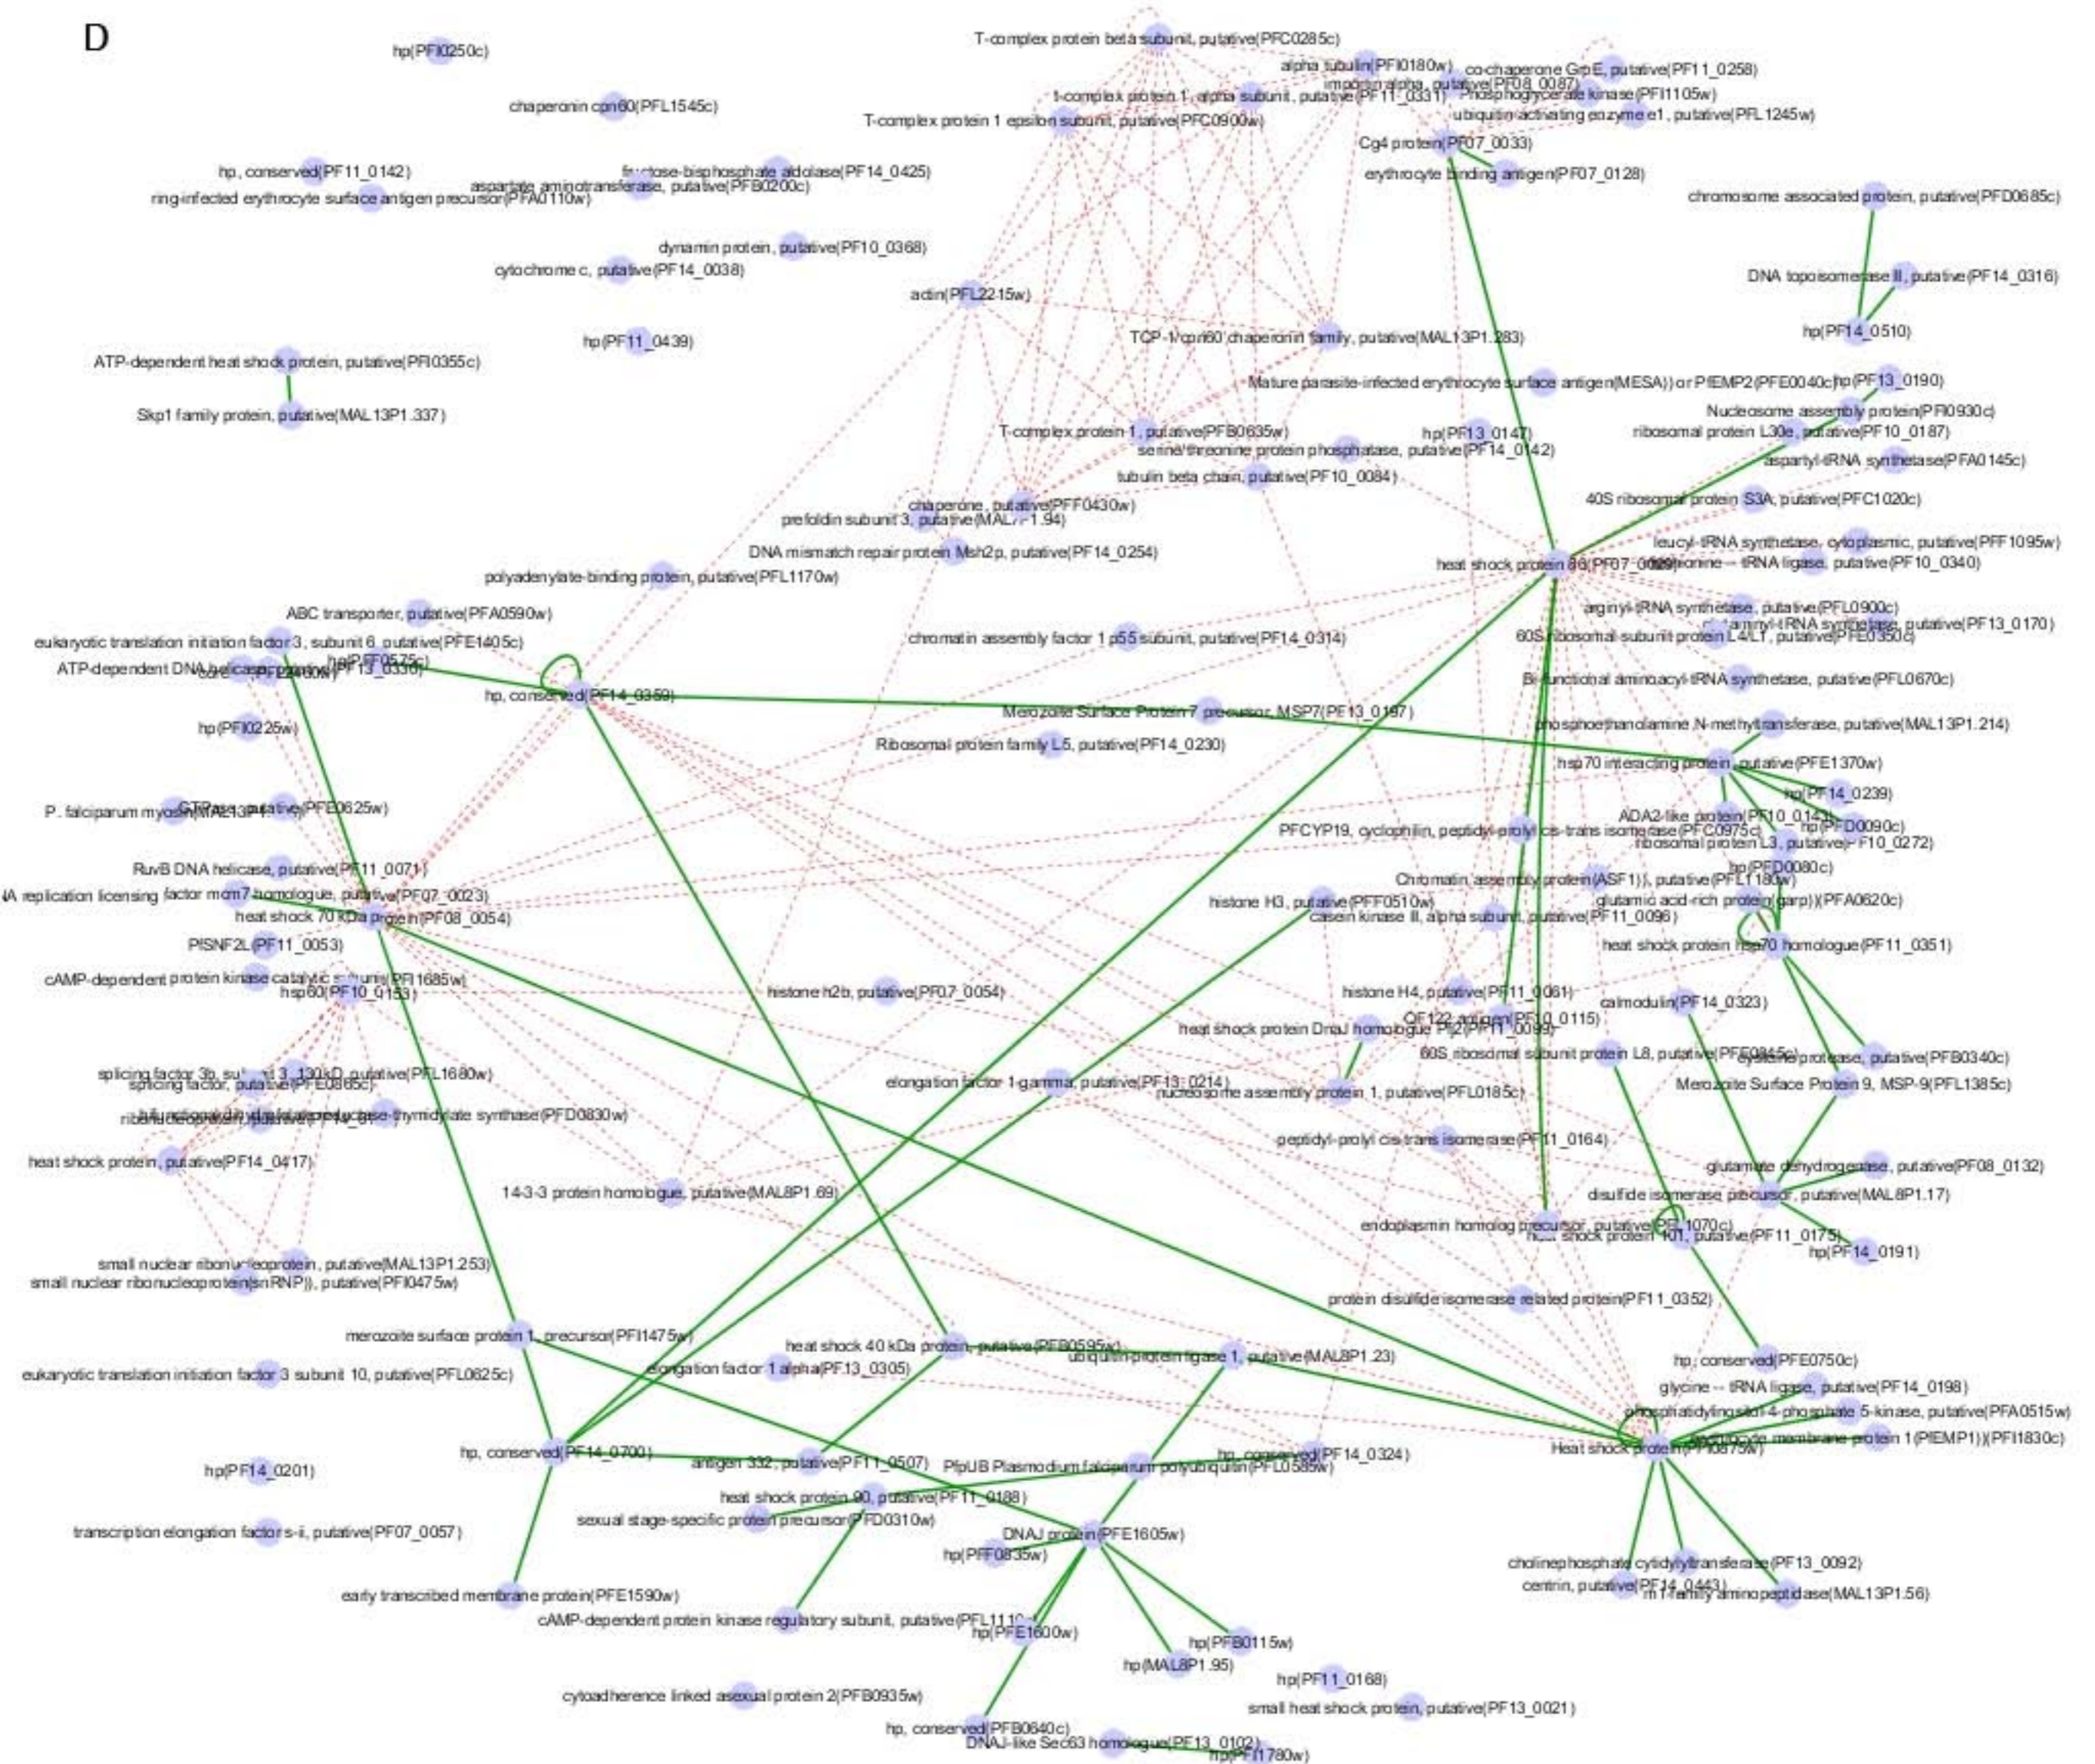

E

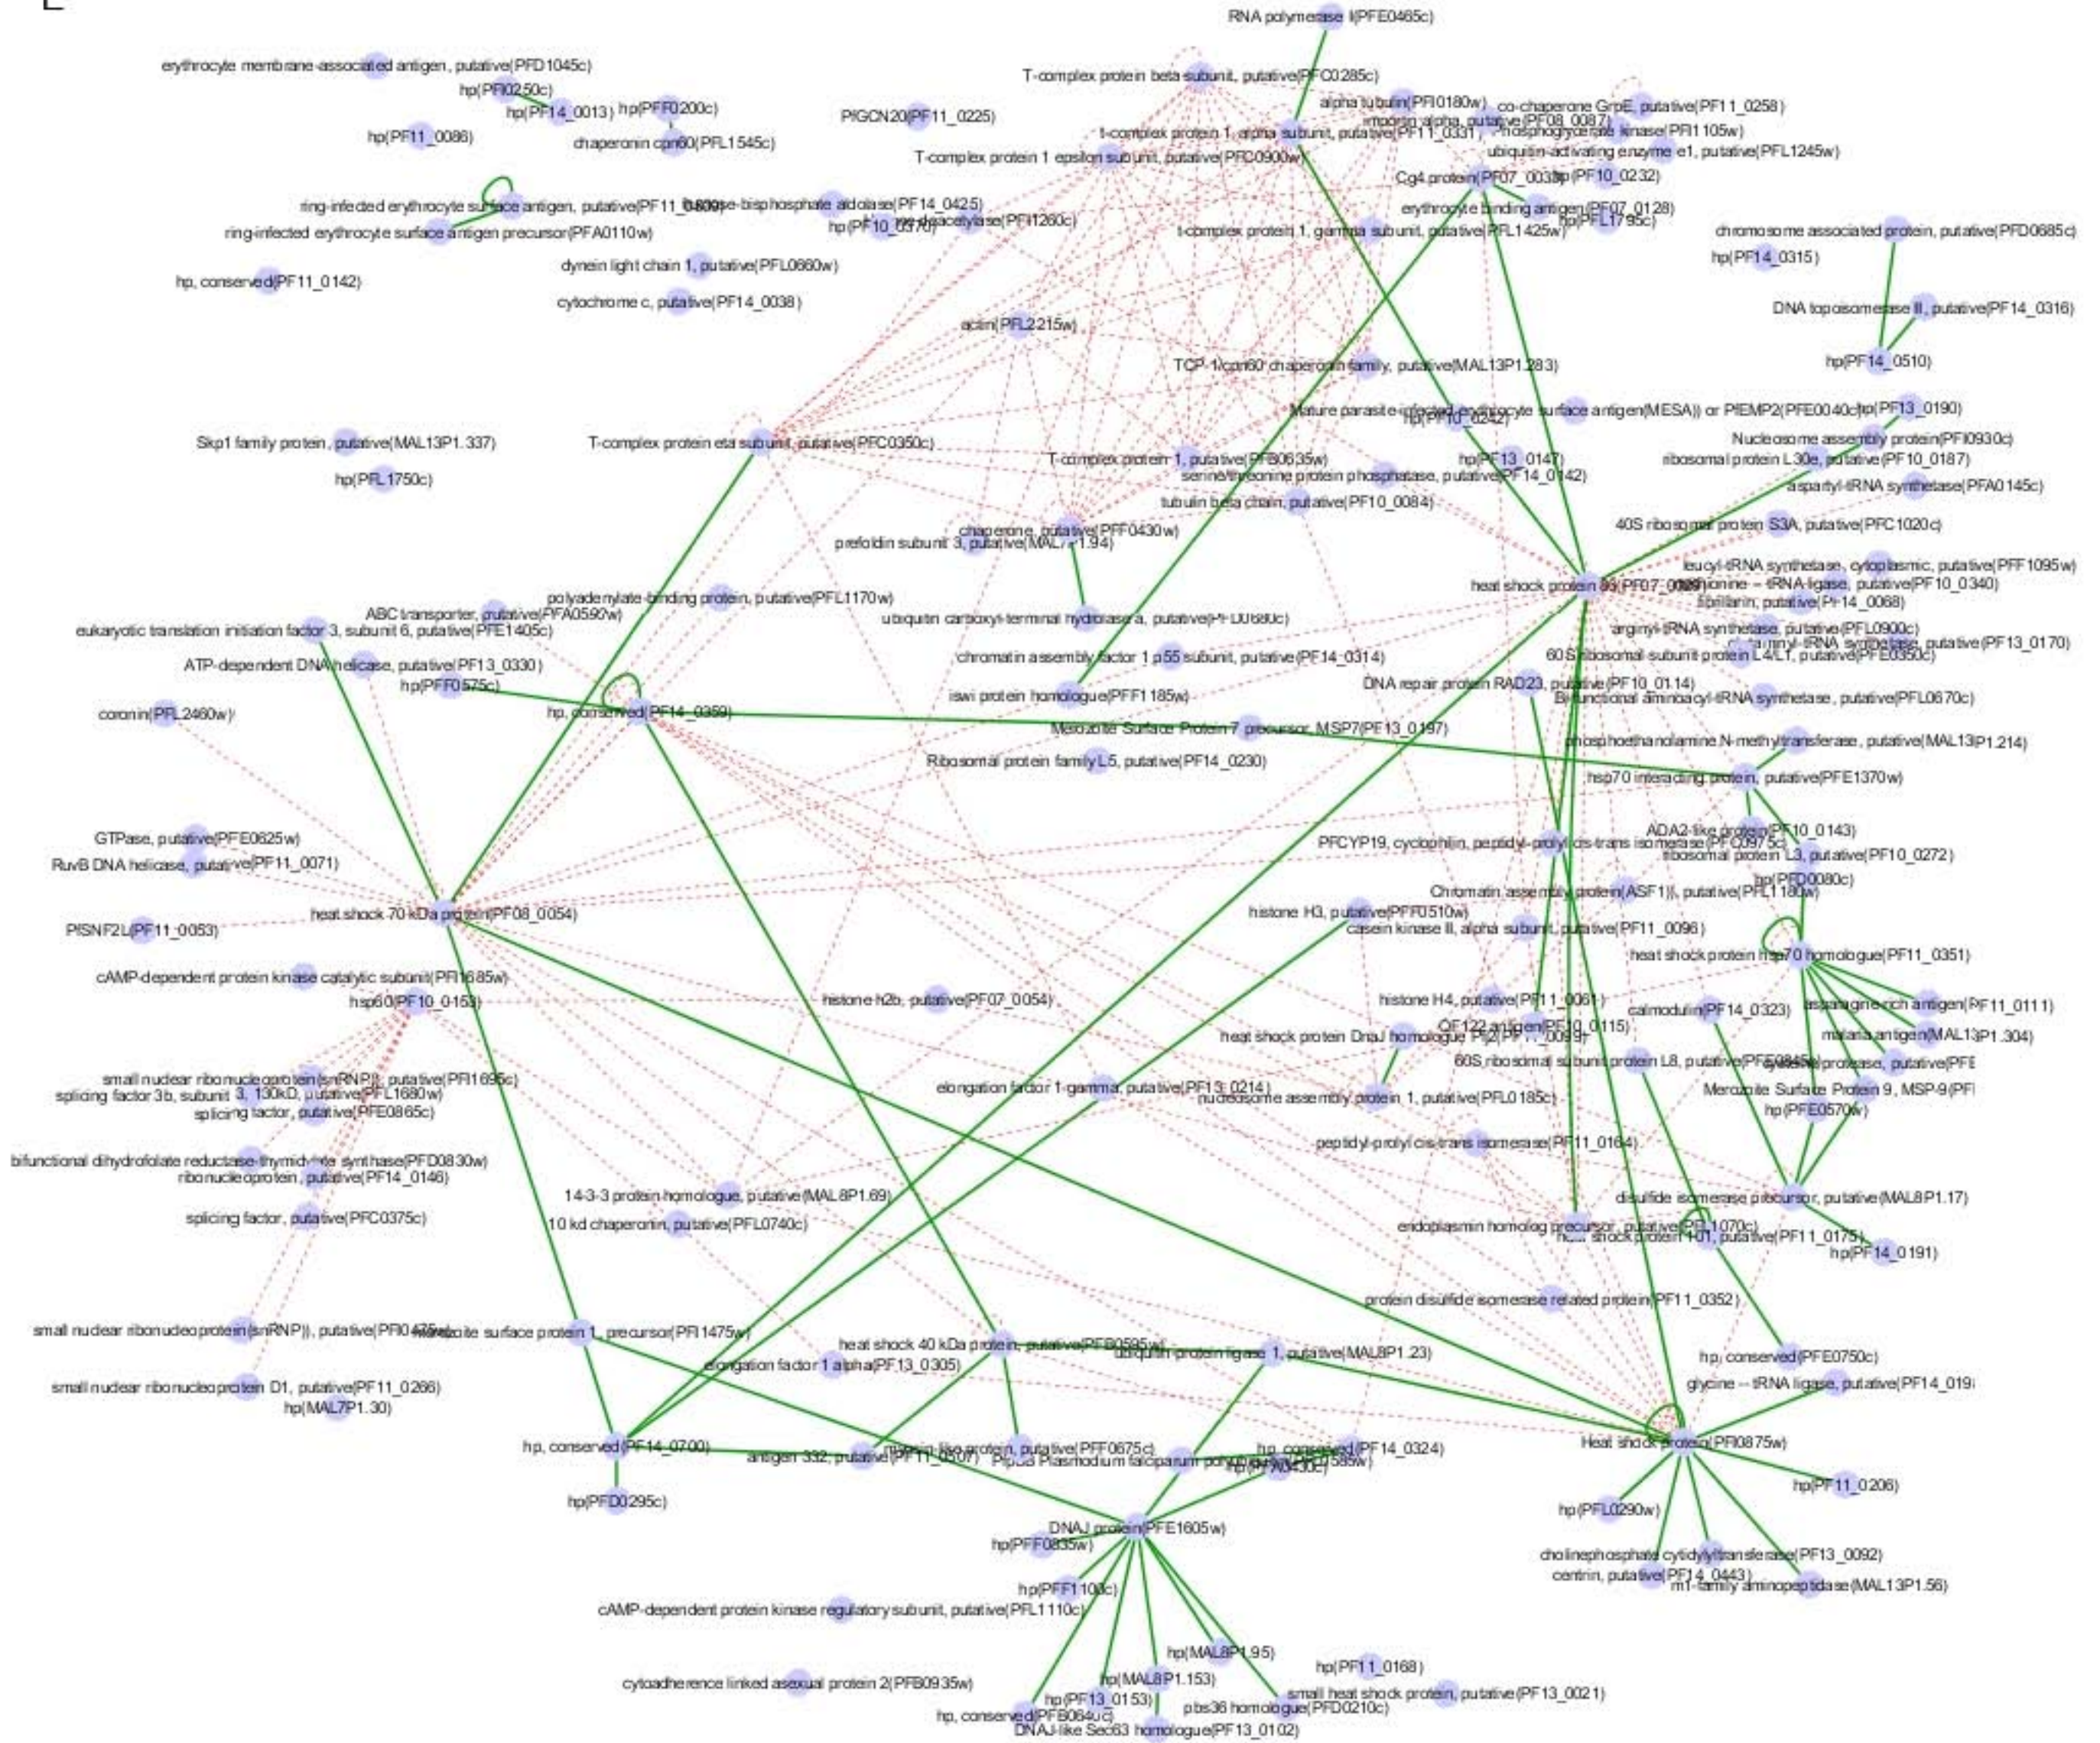

Supplement: pcbi.0030168.sg003.pdf [file pcbi.0030168.sg003.pdf]
